# Supplementary material for: Investigation of the slow relaxation of the magnetization dynamics in homoleptic ene-diamido organodysprosium(iii) complexes with K+/arene interactions
Source: Royal Society of Chemistry journal article supplement (doi:10.1039/d0ce00611d), 2020-01-01
Supplement: d0ce00611d1.pdf [file d0ce00611d1.pdf]

## SUPPORTING INFORMATION

### **Investigation of the Slow Relaxation of the Magnetization Dynamics in Homoleptic Ene-Diamido Organodysprosium(III) Complexes with K<sup>+</sup>/Arene Interactions.**

**Jérôme Long<sup>\*</sup>,<sup>a</sup> Aleksei O. Tolpygin,<sup>b</sup> Anton V. Cherkasov,<sup>b</sup> Konstantin A. Lyssenko,<sup>c,d</sup> Yannick Guari,<sup>a</sup> Joulia Larionova,<sup>a</sup> Alexander A. Trifonov<sup>\*b,c</sup>**

<sup>a</sup> *ICGM, Univ. Montpellier, CNRS, ENSCM, Montpellier, France.*

<sup>b</sup> *Institute of Organometallic Chemistry of Russian Academy of Sciences, 49 Tropinina str., GSP-445, 603950, Nizhny Novgorod, Russia. E-mail: trif@iomc.ras.ru*

<sup>c</sup> *Institute of Organoelement Compounds of Russian Academy of Sciences, 28 Vavilova str., 119334, Moscow, Russia.*

<sup>d</sup> *Lomonosov Moscow State Univ, Dept. Chem, Leninskie Gory 1, Build 3, Moscow 119991, Russia.*

## TABLE OF CONTENTS

|                                                                                                                                                                                                                                            |    |
|--------------------------------------------------------------------------------------------------------------------------------------------------------------------------------------------------------------------------------------------|----|
| Figure S1: Perspective view of the crystal packing for compounds 1, 2, and 3 along the <i>a</i> crystallographic axis. Hydrogen atoms have been omitted for clarity. ....                                                                  | 3  |
| Figure S2: Hysteresis loops obtained at 1.8 K for 1 and 2 at an average sweep rate of 22 Oe.s <sup>-1</sup> . ....                                                                                                                         | 4  |
| Figure S3: Frequency dependence of $\chi'$ and $\chi''$ for 1 and 2 under a zero-dc field. ....                                                                                                                                            | 5  |
| Figure S4: Temperature dependence of $\chi'$ and $\chi''$ for 1 and 2 for different frequencies under a zero-dc field. ....                                                                                                                | 6  |
| Figure S5: Temperature dependence of the relaxation time, $\tau$ , for 1-3 under a zero dc-field. The solid magenta lines correspond to the fit with Eq. 2. ....                                                                           | 6  |
| Figure S6: Frequency dependence of $\chi'$ and $\chi''$ for 1 (15 K) and 2 (10 K) for various dc-fields. ....                                                                                                                              | 7  |
| Figure S7: Field dependence of the relaxation time for 1 (15 K) and 2 (10 K). The solid lines represent the fit with Equation 3. ....                                                                                                      | 7  |
| Figure S8: Frequency dependence of $\chi'$ and $\chi''$ for 1 (1000 Oe) and 2 (2000 Oe). ....                                                                                                                                              | 8  |
| Figure S9: Cole-Cole (Argand) plot obtained using the ac susceptibility data for 1 and 2. The solid lines correspond to the best fit obtained with a generalized Debye model (1) or with the sum of two modified Debye functions (2). .... | 9  |
| Figure S10: Temperature dependence of the relaxation time for 1-3 using the ac susceptibility data in the presence of a dc field. The solid lines represent the fit with a Raman process. ....                                             | 10 |
| Figure S11: Orientation of the anisotropic axis (purple) in 1 obtained from the MAGELLAN <sup>1</sup> software. ....                                                                                                                       | 11 |
|                                                                                                                                                                                                                                            |    |
| Table S1: Crystallographic data and structure refinement details for 1 and 2. ....                                                                                                                                                         | 12 |
| Table S2: Fitting of the Cole-Cole plots with a generalized Debye model under a zero dc field for 1. ....                                                                                                                                  | 13 |
| Table S3: Fitting of the Cole-Cole plots with a generalized Debye model under a zero dc field for 2. ....                                                                                                                                  | 13 |
| Table S4: Fit parameters of the field dependence of the relaxation time for 1 using Eq.1 ....                                                                                                                                              | 14 |
| Table S5: Fit parameters of the field dependence of the relaxation time for 1-3 using the extracted $\tau$ values. ....                                                                                                                    | 14 |
| Table S6: Fit parameters of the field dependence of the relaxation time for 1 and 2. ....                                                                                                                                                  | 14 |
| Table S7: Fitting of the Cole-Cole plots with a generalized Debye model under a 1000 Oe dc field for 1. ....                                                                                                                               | 15 |
| Table S8: Fitting of the Cole-Cole plots under a 2000 Oe dc field for 2. ....                                                                                                                                                              | 15 |

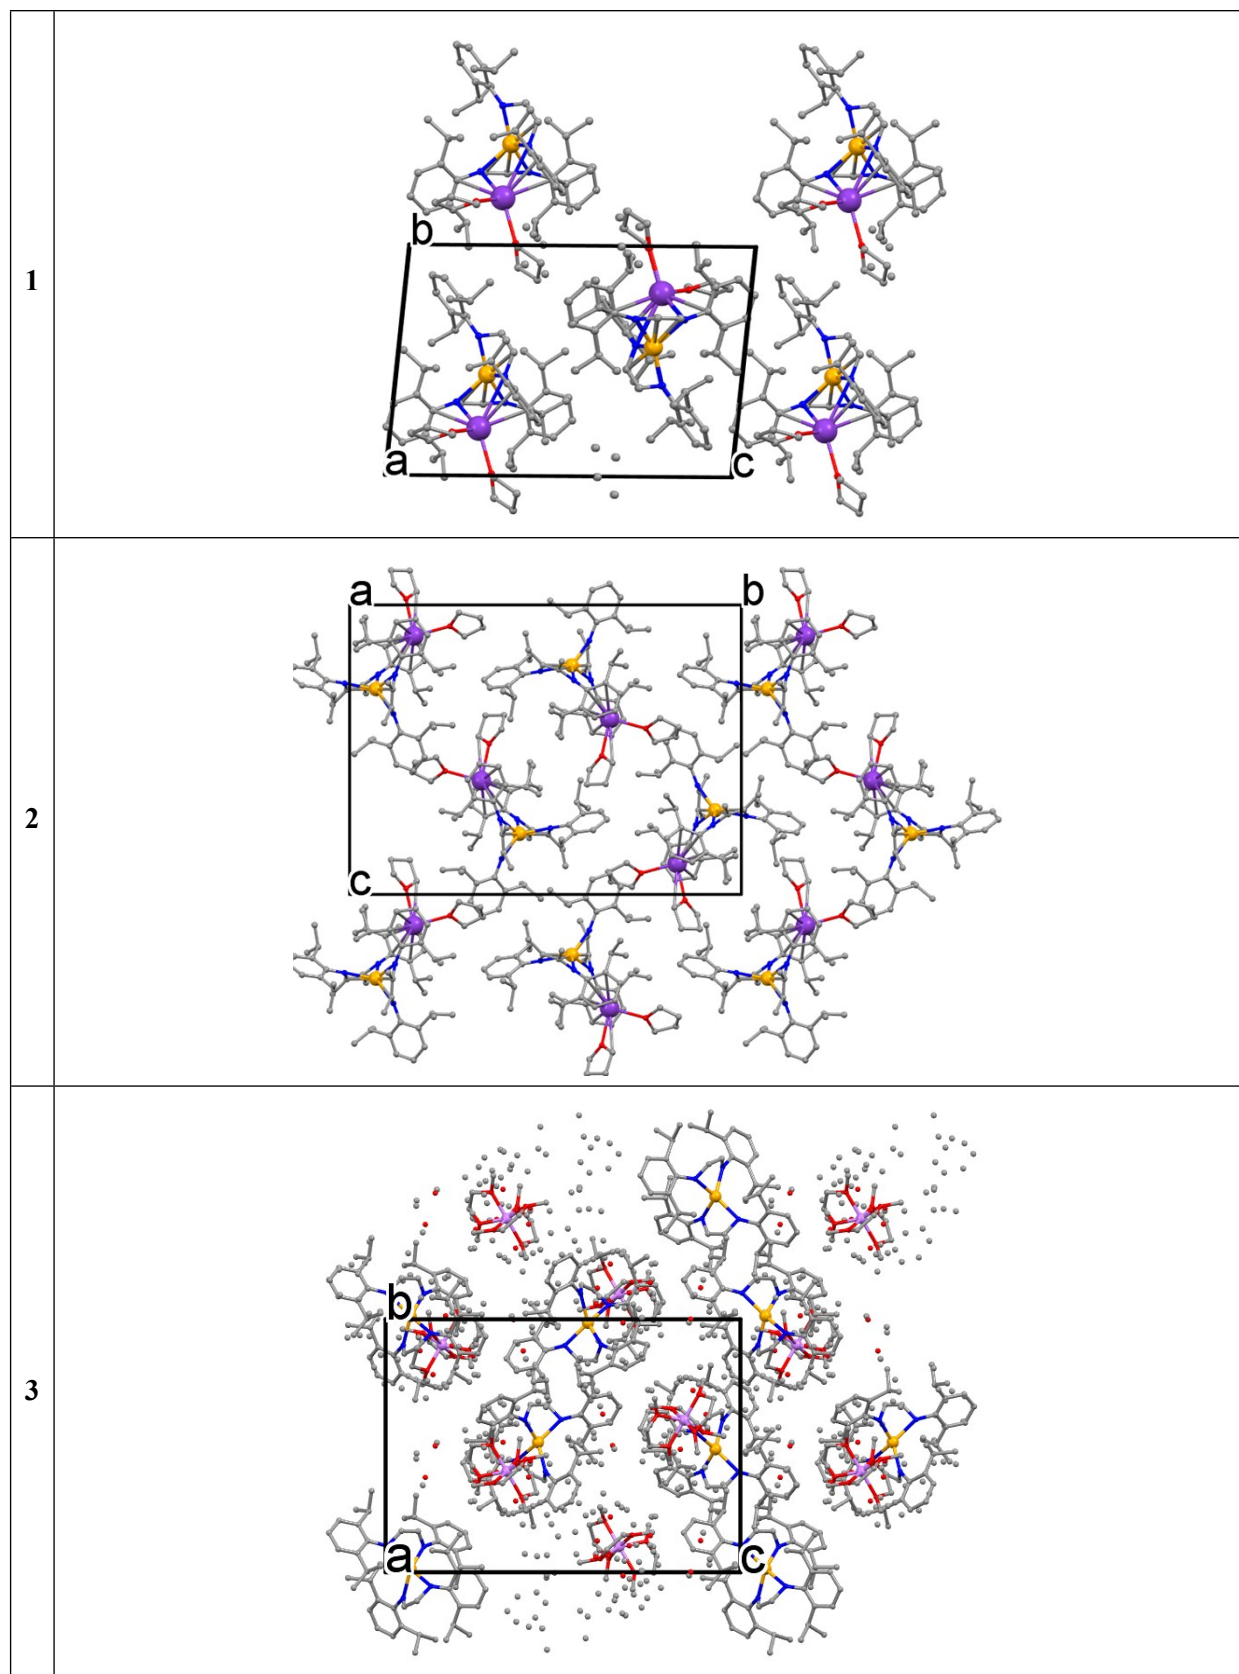

**Figure S1:** Perspective view of the crystal packing for compounds **1**, **2**, and **3** along the *a* crystallographic axis. Hydrogen atoms have been omitted for clarity.

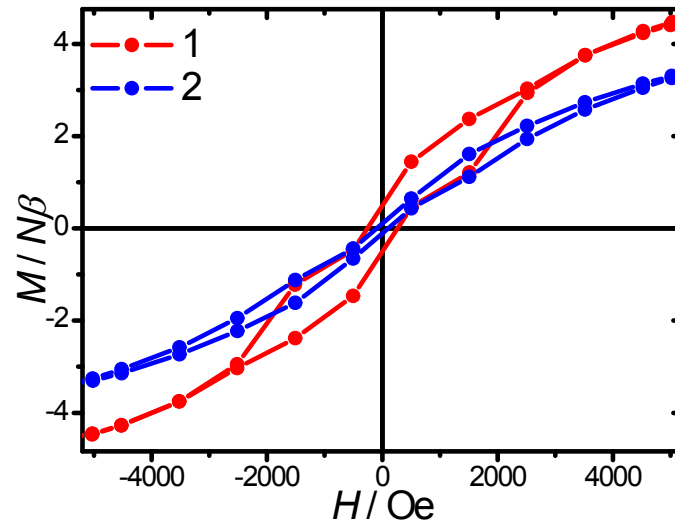

**Figure S2:** Hysteresis loops obtained at 1.8 K for 1 and 2 at an average sweep rate of 22 Oe.s<sup>-1</sup>.

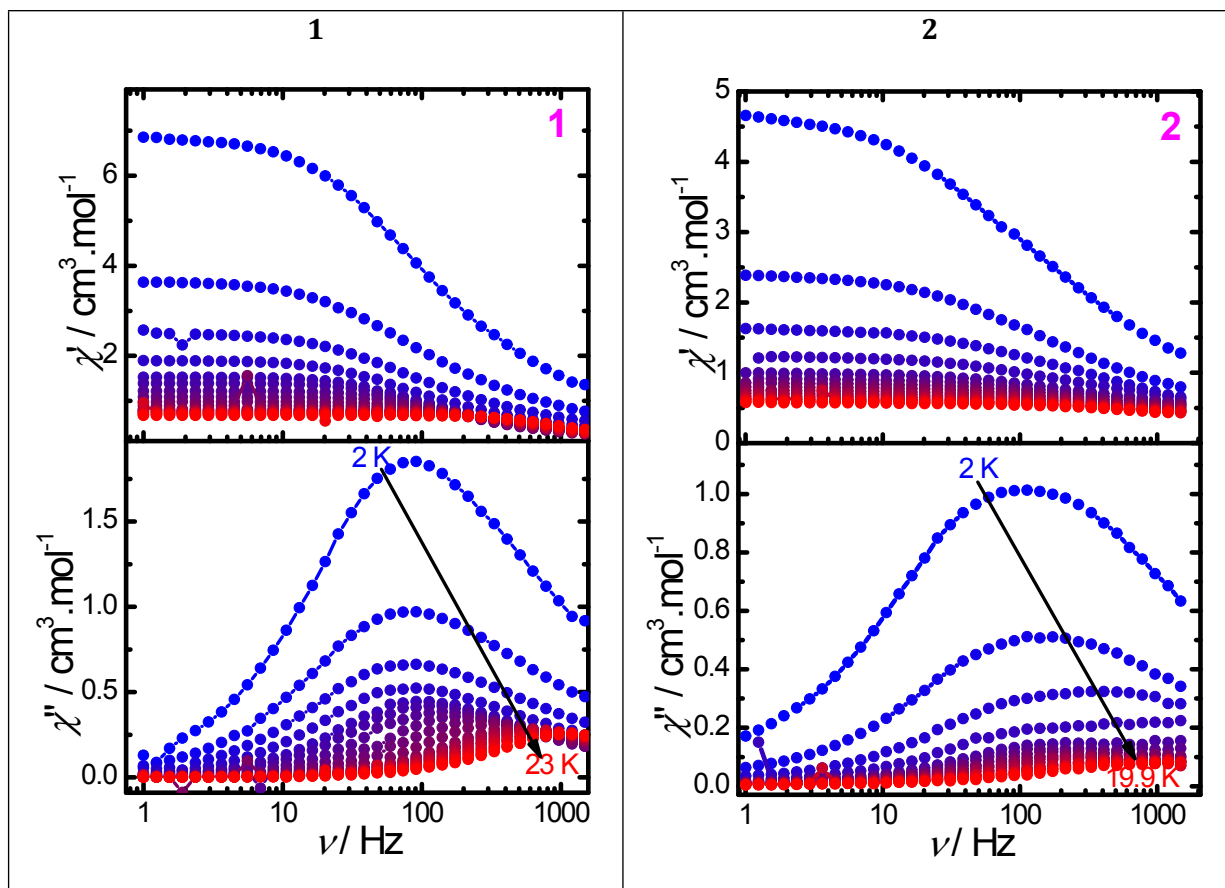

Figure S3: Frequency dependence of  $\chi'$  and  $\chi''$  for 1 and 2 under a zero-dc field.

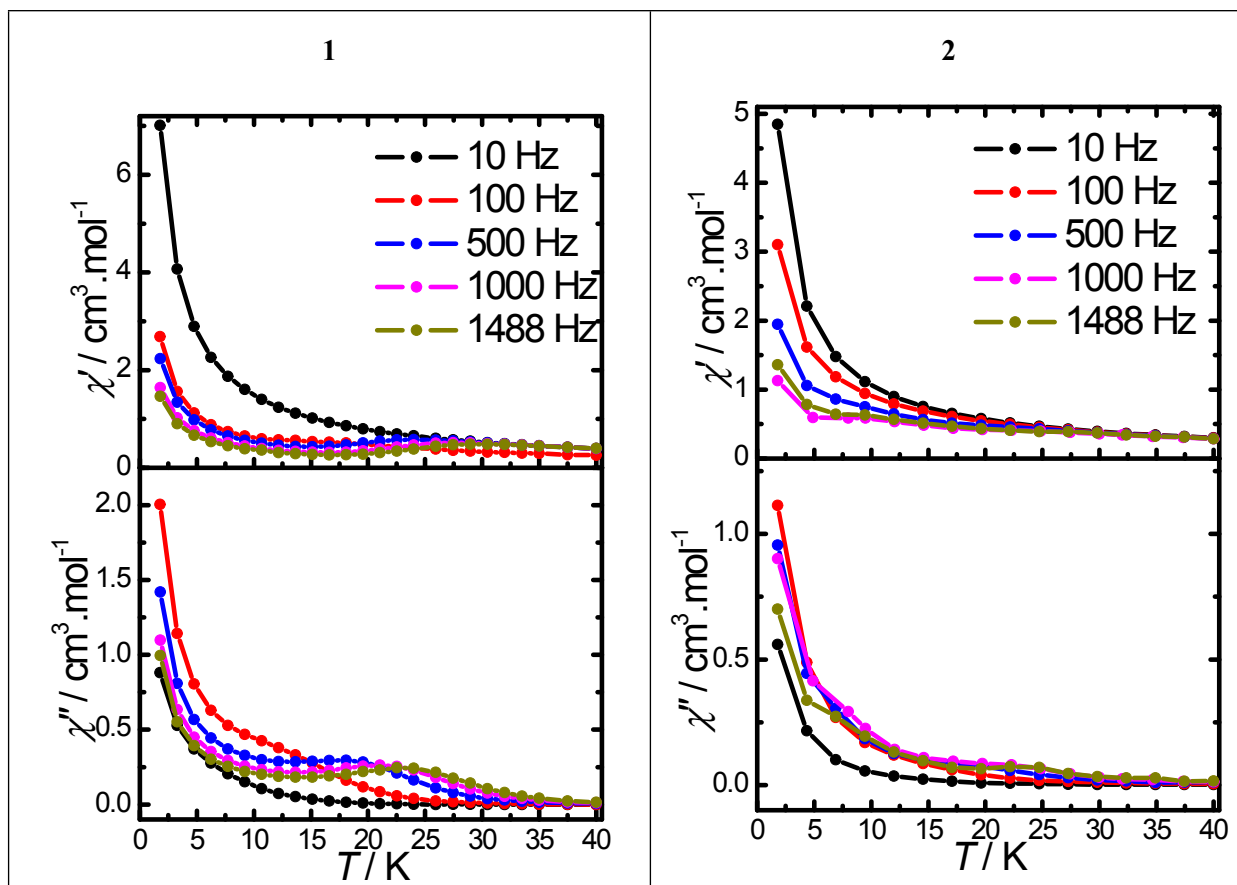

**Figure S4:** Temperature dependence of  $\chi'$  and  $\chi''$  for **1** and **2** for different frequencies under a zero-dc field.

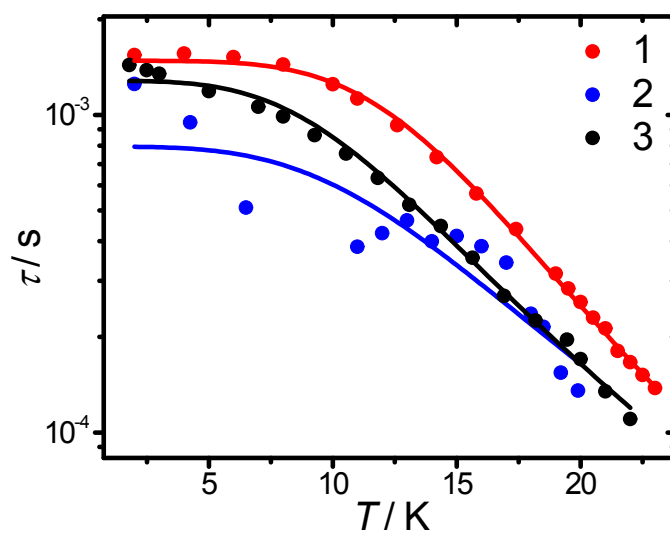

**Figure S5:** Temperature dependence of the relaxation time,  $\tau$ , for **1-3** under a zero dc-field. The solid magenta lines correspond to the fit with Eq. 2.

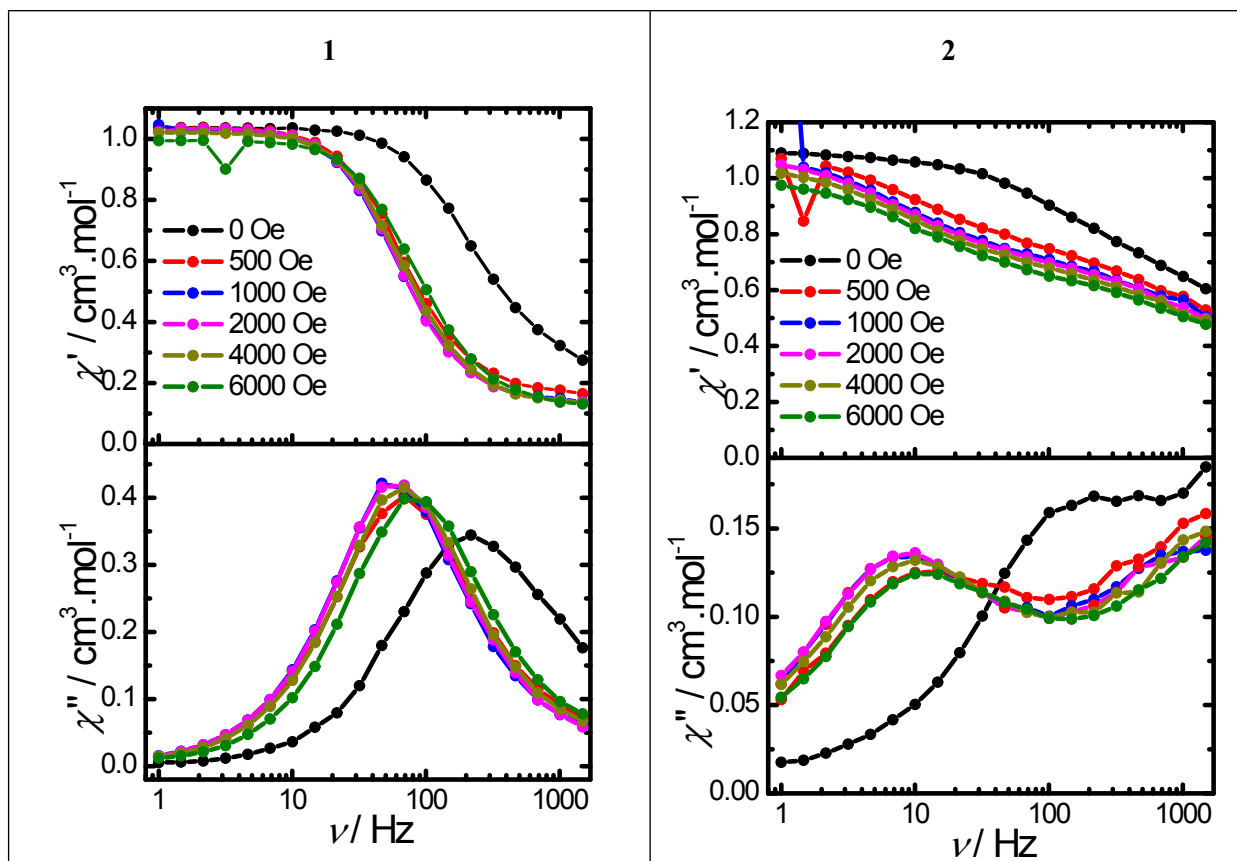

**Figure S6:** Frequency dependence of  $\chi'$  and  $\chi''$  for **1** (15 K) and **2** (10 K) for various dc-fields.

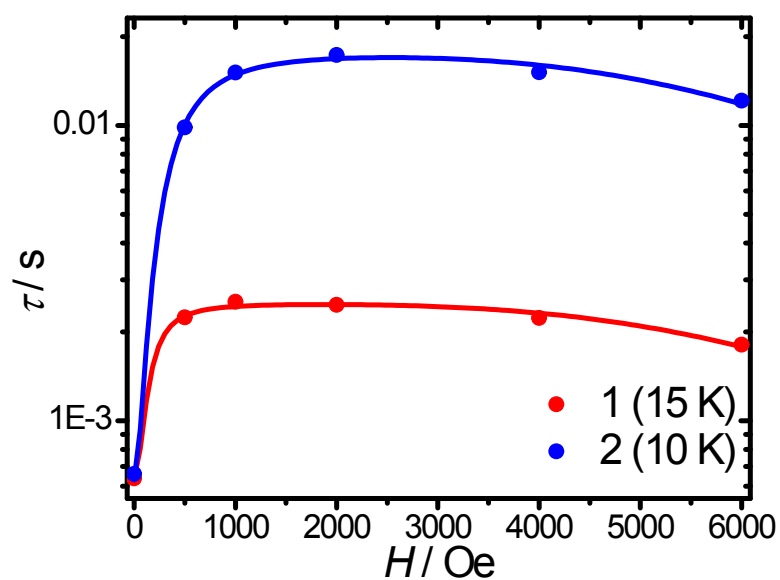

**Figure S7:** Field dependence of the relaxation time for **1** (15 K) and **2** (10 K). The solid lines represent the fit with Equation 3.

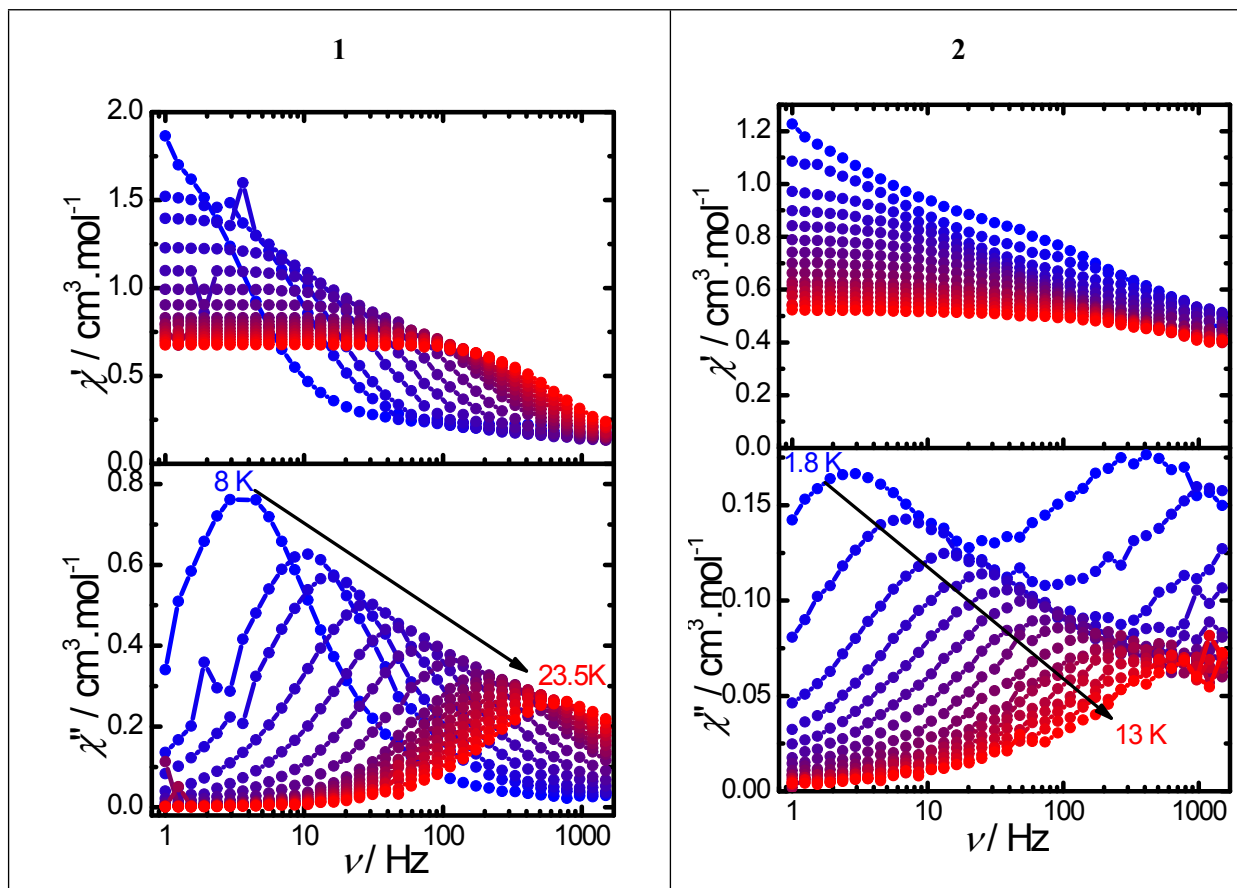

**Figure S8:** Frequency dependence of  $\chi'$  and  $\chi''$  for **1** (1000 Oe) and **2** (2000 Oe).



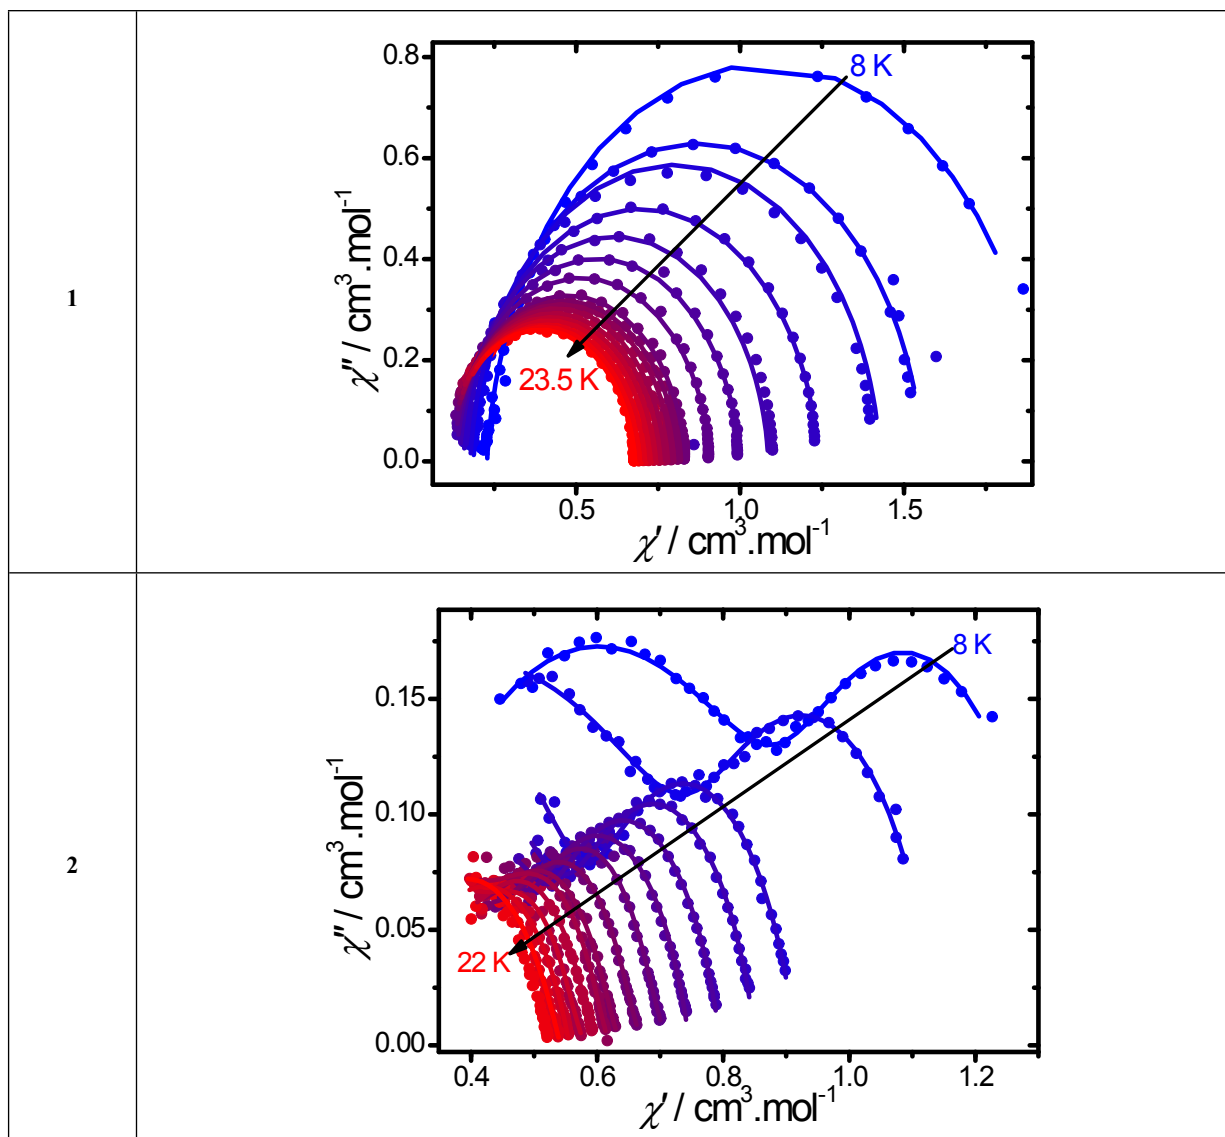

**Figure S9:** Cole-Cole (Argand) plot obtained using the ac susceptibility data for **1** and **2**. The solid lines correspond to the best fit obtained with a generalized Debye model (**1**) or with the sum of two modified Debye functions (**2**).

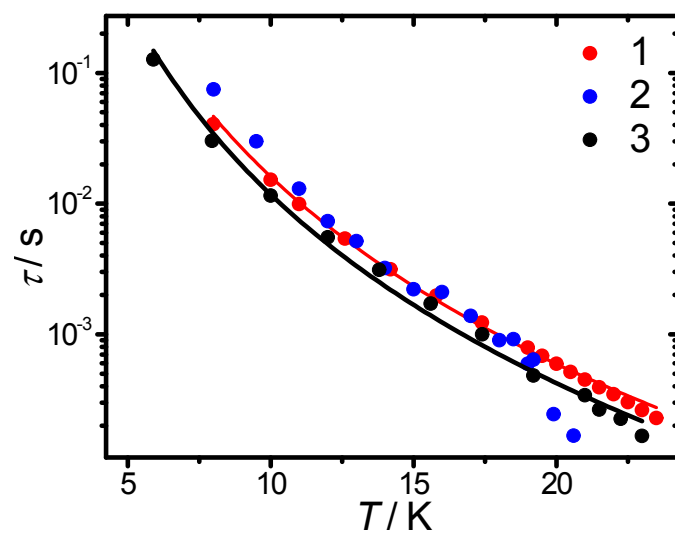

**Figure S10:** Temperature dependence of the relaxation time for 1-3 using the ac susceptibility data in the presence of a dc field. The solid lines represent the fit with a Raman process.

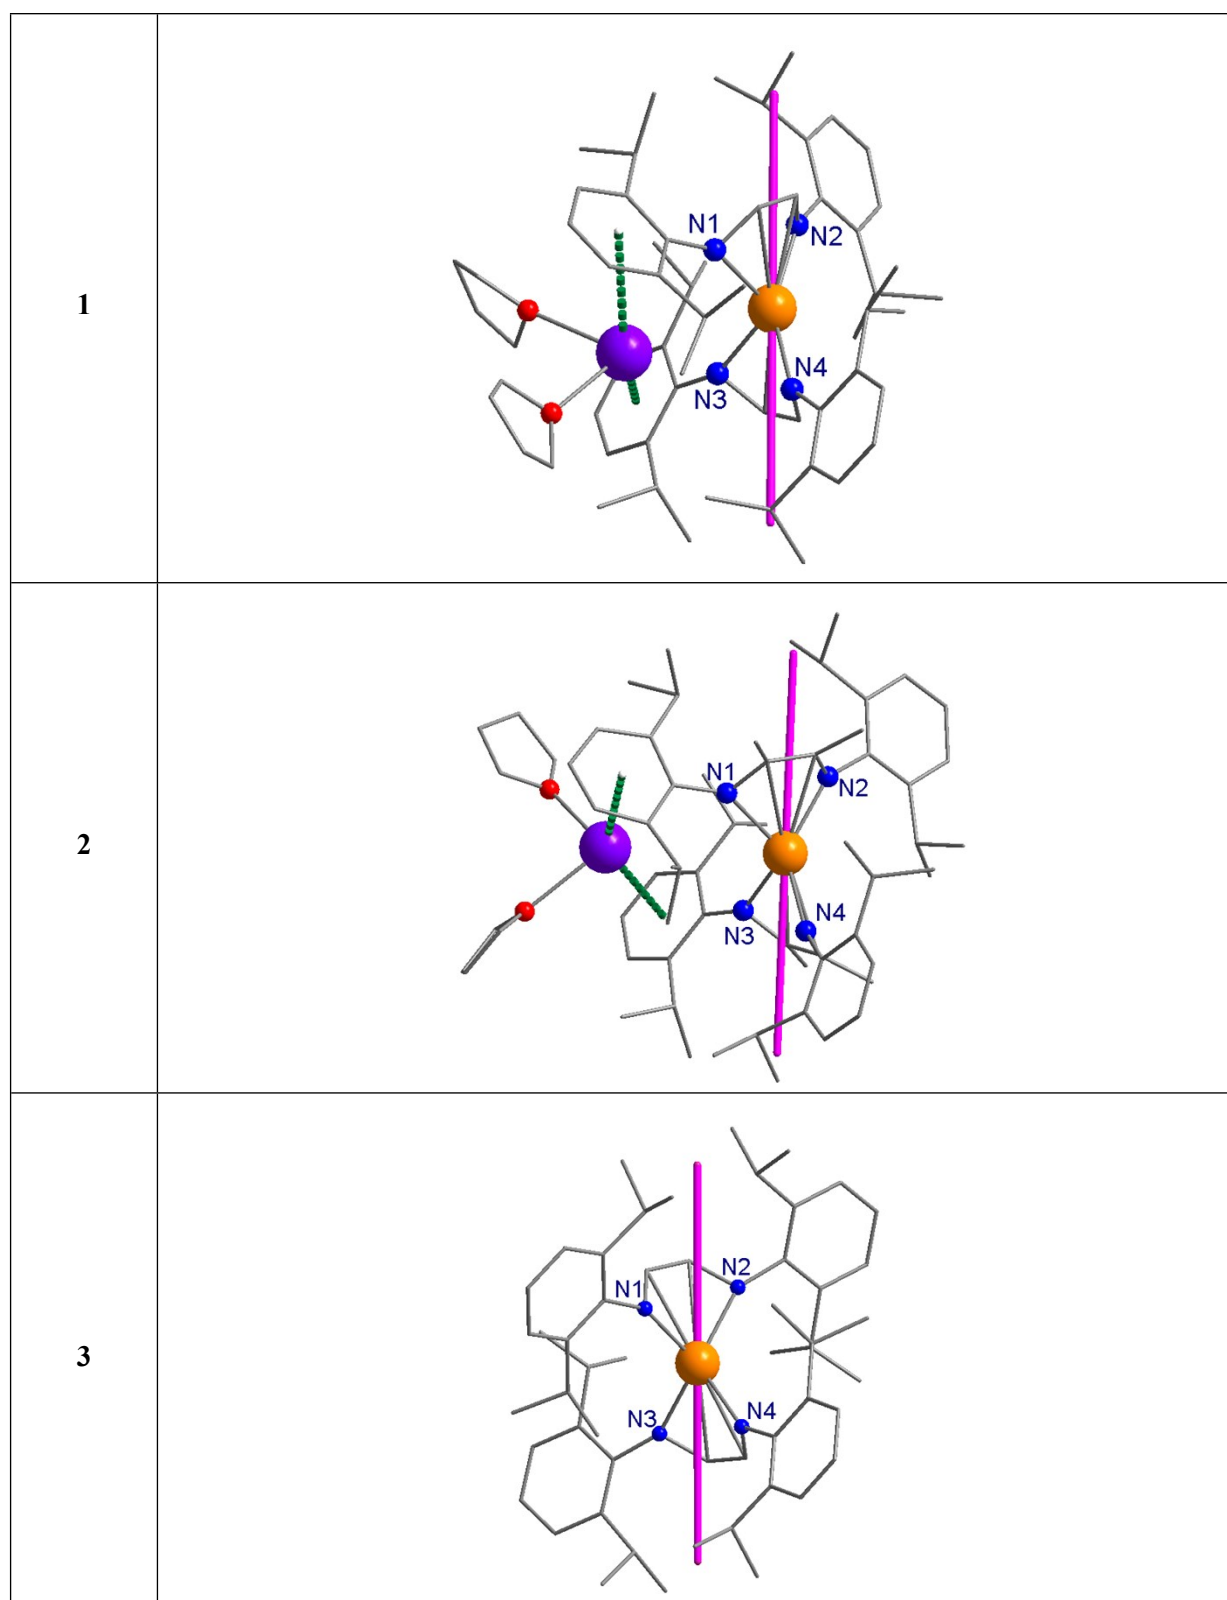

**Figure S11:** Orientation of the anisotropic axis (purple) in **1** obtained from the MAGELLAN<sup>1</sup> software.

**Table S1:** Crystallographic data and structure refinement details for 1 and 2.

| Compound                                                                               | <b>1</b>                                                          | <b>2</b>                                                          |
|----------------------------------------------------------------------------------------|-------------------------------------------------------------------|-------------------------------------------------------------------|
| Empirical formula                                                                      | C <sub>60</sub> H <sub>88</sub> DyKN <sub>4</sub> O <sub>2</sub>  | C <sub>64</sub> H <sub>96</sub> DyKN <sub>4</sub> O <sub>2</sub>  |
| Formula weight                                                                         | 1098.94                                                           | 1155.04                                                           |
| <i>T</i> , K                                                                           | 120                                                               | 200                                                               |
| Crystal system                                                                         | Triclinic                                                         | Monoclinic                                                        |
| Space group                                                                            | <i>P</i> -1                                                       | <i>P</i> 2 <sub>1</sub> / <i>n</i>                                |
| <i>a</i> , Å                                                                           | 11.7767(7)                                                        | 10.98330(10)                                                      |
| <i>b</i> , Å                                                                           | 13.3468(11)                                                       | 27.4951(3)                                                        |
| <i>c</i> , Å                                                                           | 19.3209(11)                                                       | 20.5502(2)                                                        |
| $\alpha$ , deg                                                                         | 81.5632(16)                                                       | 90                                                                |
| $\beta$ , deg                                                                          | 79.7047(11)                                                       | 98.2020(10)                                                       |
| $\gamma$ , deg                                                                         | 72.2832(9)                                                        | 90                                                                |
| <i>V</i> , Å <sup>3</sup>                                                              | 2832.4(3)                                                         | 6142.41(11)                                                       |
| <i>Z</i>                                                                               | 2                                                                 | 4                                                                 |
| <i>d</i> <sub>calcd</sub> , g/cm <sup>3</sup>                                          | 1.289                                                             | 1.249                                                             |
| Absorption coefficient, mm <sup>-1</sup>                                               | 1.436                                                             | 1.328                                                             |
| <i>F</i> <sub>000</sub>                                                                | 1154                                                              | 2436                                                              |
| Crystal size, mm                                                                       | 0.43 × 0.28 × 0.21                                                | 0.30 × 0.25 × 0.20                                                |
| $\theta$ range for data collection, deg                                                | 1.61–30.03                                                        | 3.02–30.03                                                        |
| Index ranges                                                                           | -16 ≤ <i>h</i> ≤ 16<br>-18 ≤ <i>k</i> ≤ 18<br>-27 ≤ <i>l</i> ≤ 27 | -15 ≤ <i>h</i> ≤ 15<br>-38 ≤ <i>k</i> ≤ 38<br>-28 ≤ <i>l</i> ≤ 28 |
| Reflections collected                                                                  | 36781                                                             | 174348                                                            |
| Unique / observed ( <i>I</i> > 2 $\sigma$ ( <i>I</i> )) reflections                    | 16547 / 14934                                                     | 17942 / 13518                                                     |
| <i>R</i> <sub>int</sub>                                                                | 0.0261                                                            | 0.0626                                                            |
| Completeness to $\theta$ , %                                                           | 99.8                                                              | 99.8                                                              |
| Data / restraints / parameters                                                         | 16547 / 92 / 689                                                  | 17942 / 1364 / 972                                                |
| <i>S</i> ( <i>F</i> <sup>2</sup> )                                                     | 1.032                                                             | 1.017                                                             |
| Final <i>R</i> indices ( <i>F</i> <sup>2</sup> > 2 $\sigma$ ( <i>F</i> <sup>2</sup> )) | <i>R</i> <sub>1</sub> = 0.0266<br><i>wR</i> <sub>2</sub> = 0.0573 | <i>R</i> <sub>1</sub> = 0.0313<br><i>wR</i> <sub>2</sub> = 0.0620 |
| <i>R</i> indices (all data)                                                            | <i>R</i> <sub>1</sub> = 0.0319<br><i>wR</i> <sub>2</sub> = 0.0593 | <i>R</i> <sub>1</sub> = 0.0544<br><i>wR</i> <sub>2</sub> = 0.0693 |
| Largest diff. peak and hole, e/Å <sup>3</sup>                                          | 0.81 / -0.54                                                      | 0.56 / -0.54                                                      |

**Table S2:** Fitting of the Cole-Cole plots with a generalized Debye model under a zero dc field for **1**.

| $T$ (K) | $\chi_s$ (cm <sup>3</sup> . mol <sup>-1</sup> ) | $\chi_T$ (cm <sup>3</sup> . mol <sup>-1</sup> ) | $\alpha$ |
|---------|-------------------------------------------------|-------------------------------------------------|----------|
| 2       | 0.8946                                          | 7.00336                                         | 0.29475  |
| 4       | 0.53619                                         | 3.73958                                         | 0.29746  |
| 6       | 0.40245                                         | 2.54412                                         | 0.28608  |
| 8       | 0.34036                                         | 1.93861                                         | 0.25528  |
| 10      | 0.2945                                          | 1.55602                                         | 0.21416  |
| 11      | 0.27602                                         | 1.41483                                         | 0.19213  |
| 12.6    | 0.25743                                         | 1.23083                                         | 0.14327  |
| 14.2    | 0.22599                                         | 1.09578                                         | 0.12419  |
| 15.8    | 0.20117                                         | 0.98596                                         | 0.10767  |
| 17.4    | 0.17413                                         | 0.92276                                         | 0.12018  |
| 19      | 0.16848                                         | 0.82108                                         | 0.06973  |
| 19.5    | 0.16208                                         | 0.79604                                         | 0.06638  |
| 20      | 0.15636                                         | 0.78071                                         | 0.06558  |
| 20.5    | 0.14498                                         | 0.75887                                         | 0.07035  |
| 21      | 0.15237                                         | 0.74355                                         | 0.05432  |
| 21.5    | 0.11857                                         | 0.73635                                         | 0.10482  |
| 22      | 0.13059                                         | 0.71198                                         | 0.06349  |
| 22.5    | 0.13859                                         | 0.68724                                         | 0.04775  |
| 23      | 0.13096                                         | 0.67976                                         | 0.05399  |

**Table S3:** Fitting of the Cole-Cole plots with a generalized Debye model under a zero dc field for **2**.

| $T$ (K) | $\chi_s$ (cm <sup>3</sup> . mol <sup>-1</sup> ) | $\chi_T$ (cm <sup>3</sup> . mol <sup>-1</sup> ) | $\alpha$ |
|---------|-------------------------------------------------|-------------------------------------------------|----------|
| 2.00    | 0.61786                                         | 0.02901                                         | 0.42505  |
| 4.25    | 0.47754                                         | 0.01323                                         | 0.38148  |
| 6.50    | 0.31783                                         | 0.01499                                         | 0.41276  |
| 11.00   | 0.39731                                         | 0.01539                                         | 0.41496  |
| 12.00   | 0.40697                                         | 0.0254                                          | 0.41327  |
| 13.00   | 0.429                                           | 0.00748                                         | 0.36118  |
| 14.00   | 0.40414                                         | 0.02144                                         | 0.36691  |
| 15.00   | 0.40564                                         | 0.00635                                         | 0.3363   |
| 16.00   | 0.39338                                         | 0.00469                                         | 0.32208  |
| 17.00   | 0.38108                                         | 0.00574                                         | 0.31179  |
| 18.00   | 0.33078                                         | 0.04602                                         | 0.37196  |
| 18.50   | 0.33029                                         | 0.00681                                         | 0.3413   |

|       |         |         |         |
|-------|---------|---------|---------|
| 19.20 | 0.2995  | 0.00738 | 0.37111 |
| 19.90 | 0.28751 | 0.00924 | 0.35876 |

**Table S4:** Fit parameters of the field dependence of the relaxation time for **1** using Eq.1 .

| Compound                                                                    | $\Delta(cm^{-1})$ | $\tau_0 (s)$                | $n$           | $C (s^{-1}.K^{-n})$              | $\tau_{QTM} (ms)$ |
|-----------------------------------------------------------------------------|-------------------|-----------------------------|---------------|----------------------------------|-------------------|
| <b>1</b> (0 Oe)<br>Obtained without considering the log normal distribution | $22 \pm 6$        | $(3 \pm 2) \times 10^{-10}$ | 5.7*          | $(1.03 \pm 0.03) \times 10^{-4}$ | $1.56 \pm 0.09$   |
| <b>1</b> (0 Oe)<br>With the Log normal distribution                         | $203 \pm 1453$    | $10^{-10(20)}$              | $1.03 \pm 11$ | $10^{-2(20)}$                    | $10^{-3(0.3)}$    |

\*Fixed parameter

**Table S5:** Fit parameters of the field dependence of the relaxation time for **1-3** using the extracted  $\tau$  values.

| Compound           | $n$             | $C (s^{-1}.K^{-m})$            | $\tau_{QTM} (s)$     |
|--------------------|-----------------|--------------------------------|----------------------|
| <b>1</b> (0 Oe)    | $5.04 \pm 0.09$ | $0.0009 \pm 0.0002$            | -                    |
| <b>1</b> (1000 Oe) | $5.74 \pm 0.08$ | $0.00006 \pm 0.00002$          | $0.00144 \pm 0.0006$ |
| <b>2</b> (0 Oe)    | 8.3*            | $(9.5 \pm 0.7) \times 10^{-9}$ | $0.00144 \pm 0.0006$ |
| <b>3</b> (0 Oe)    | $4.2 \pm 0.2$   | $0.02 \pm 0.01$                | $0.0012 \pm 0.0001$  |
| <b>3</b> (3500 Oe) | $6.3 \pm 0.3$   | $0.01 \pm 0.00001$             | -                    |

\*Fixed parameter

**Table S6:** Fit parameters of the field dependence of the relaxation time for **1** and **2**.

| Compound        | $D (s^{-1}K^{-1}Oe^{-4})$ | $B_1 (s^{-1})$ | $B_2 (Oe^{-2})$       | $K$    |
|-----------------|---------------------------|----------------|-----------------------|--------|
| <b>1</b> (15 K) | $8.3 \times 10^{-15}$     | 1169.9         | $1.06 \times 10^{-4}$ | 399.08 |
| <b>2</b> (10 K) | $2.1 \times 10^{-15}$     | 1527.21        | $1.4 \times 10^{-4}$  | 56.24  |

**Table S7:** Fitting of the Cole-Cole plots with a generalized Debye model under a 1000 Oe dc field for **1**.

| $T$ (K) | $\chi_s$ (cm <sup>3</sup> . mol <sup>-1</sup> ) | $\chi_T$ (cm <sup>3</sup> . mol <sup>-1</sup> ) | $\alpha$ |
|---------|-------------------------------------------------|-------------------------------------------------|----------|
| 8       | 0.22814                                         | 1.92339                                         | 0.04864  |
| 10      | 0.18638                                         | 1.55864                                         | 0.05512  |
| 11      | 0.17713                                         | 1.42737                                         | 0.04033  |
| 12.6    | 0.15609                                         | 1.23843                                         | 0.05049  |
| 14.2    | 0.14409                                         | 1.08596                                         | 0.03572  |
| 15.8    | 0.13291                                         | 0.99804                                         | 0.04746  |
| 17.4    | 0.12486                                         | 0.90834                                         | 0.04728  |
| 19      | 0.11506                                         | 0.83443                                         | 0.05724  |
| 19.5    | 0.11178                                         | 0.81322                                         | 0.06167  |
| 20      | 0.11379                                         | 0.79386                                         | 0.05655  |
| 20.5    | 0.1117                                          | 0.77002                                         | 0.05306  |
| 21      | 0.10464                                         | 0.7574                                          | 0.06802  |
| 21.5    | 0.10275                                         | 0.74146                                         | 0.07151  |
| 22      | 0.11139                                         | 0.7243                                          | 0.05928  |
| 22.5    | 0.10454                                         | 0.70881                                         | 0.07011  |
| 23      | 0.10426                                         | 0.69394                                         | 0.06457  |
| 23.5    | 0.10167                                         | 0.67913                                         | 0.06447  |

**Table S8.** Fitting of the Cole-Cole plots under a 2000 Oe dc field for **2**.

| $T$ (K) | $\chi_{Tot}$ (cm <sup>3</sup> . mol <sup>-1</sup> ) | $\Delta\chi_1$ (cm <sup>3</sup> . mol <sup>-1</sup> ) | $\alpha_1$ | $\Delta\chi_2$ (cm <sup>3</sup> . mol <sup>-1</sup> ) | $\alpha_2$ |
|---------|-----------------------------------------------------|-------------------------------------------------------|------------|-------------------------------------------------------|------------|
| 8       | 0.23                                                | 0.395                                                 | 0.199      | 0.708                                                 | 0.437      |
| 9.5     | 0.00536                                             | 0.346                                                 | 0.231      | 0.794                                                 | 0.504      |
| 11      | 0.00506                                             | 0.319                                                 | 0.245      | 0.674                                                 | 0.477      |
| 12      | 0.0219                                              | 0.323                                                 | 0.268      | 0.571                                                 | 0.357      |
| 13      | 0.0368                                              | 0.288                                                 | 0.26       | 0.527                                                 | 0.405      |
| 14      | 0.347                                               | 0.293                                                 | 0.276      | 0.156                                                 | 0.0775     |
| 15      | 0.281                                               | 0.274                                                 | 0.281      | 0.192                                                 | 0.118      |
| 16      | 0.247                                               | 0.11                                                  | 0.0857     | 0.356                                                 | 0.602      |
| 17      | 5.86E-7                                             | 0.131                                                 | 0.149      | 0.545                                                 | 0.673      |
| 18      | 7.94E-13                                            | 0.131                                                 | 0.19       | 0.508                                                 | 0.658      |
| 18.5    | 2.7E-13                                             | 0.104                                                 | 0.154      | 0.517                                                 | 0.607      |
| 19.2    | 4.8E-13                                             | 0.129                                                 | 0.205      | 0.473                                                 | 0.663      |
| 19.9    | 3.83E-12                                            | 0.0739                                                | 0.116      | 0.507                                                 | 0.613      |

|      |          |       |       |       |       |
|------|----------|-------|-------|-------|-------|
| 20.6 | 7.39E-11 | 0.22  | 0.361 | 0.336 | 0.472 |
| 21.3 | 6.86E-11 | 0.186 | 0.35  | 0.357 | 0.623 |

## References

- 1 N. F. Chilton, D. Collison, E. J. L. McInnes, R. E. P. Winpenney and A. Soncini, *Nat. Commun.*, 2013, **4**, 2551.
